# Supplementary material for: A proposed division of the family Picornaviridae into subfamilies based on phylogenetic relationships and functional genomic organization
Source: PubMed Central journal article supplement (PMC8421316; doi:10.1007/s00705-021-05178-9), 2021-08-04
Supplement: 705_2021_5178_MOESM1_ESM.pdf [file 705_2021_5178_MOESM1_ESM.pdf]

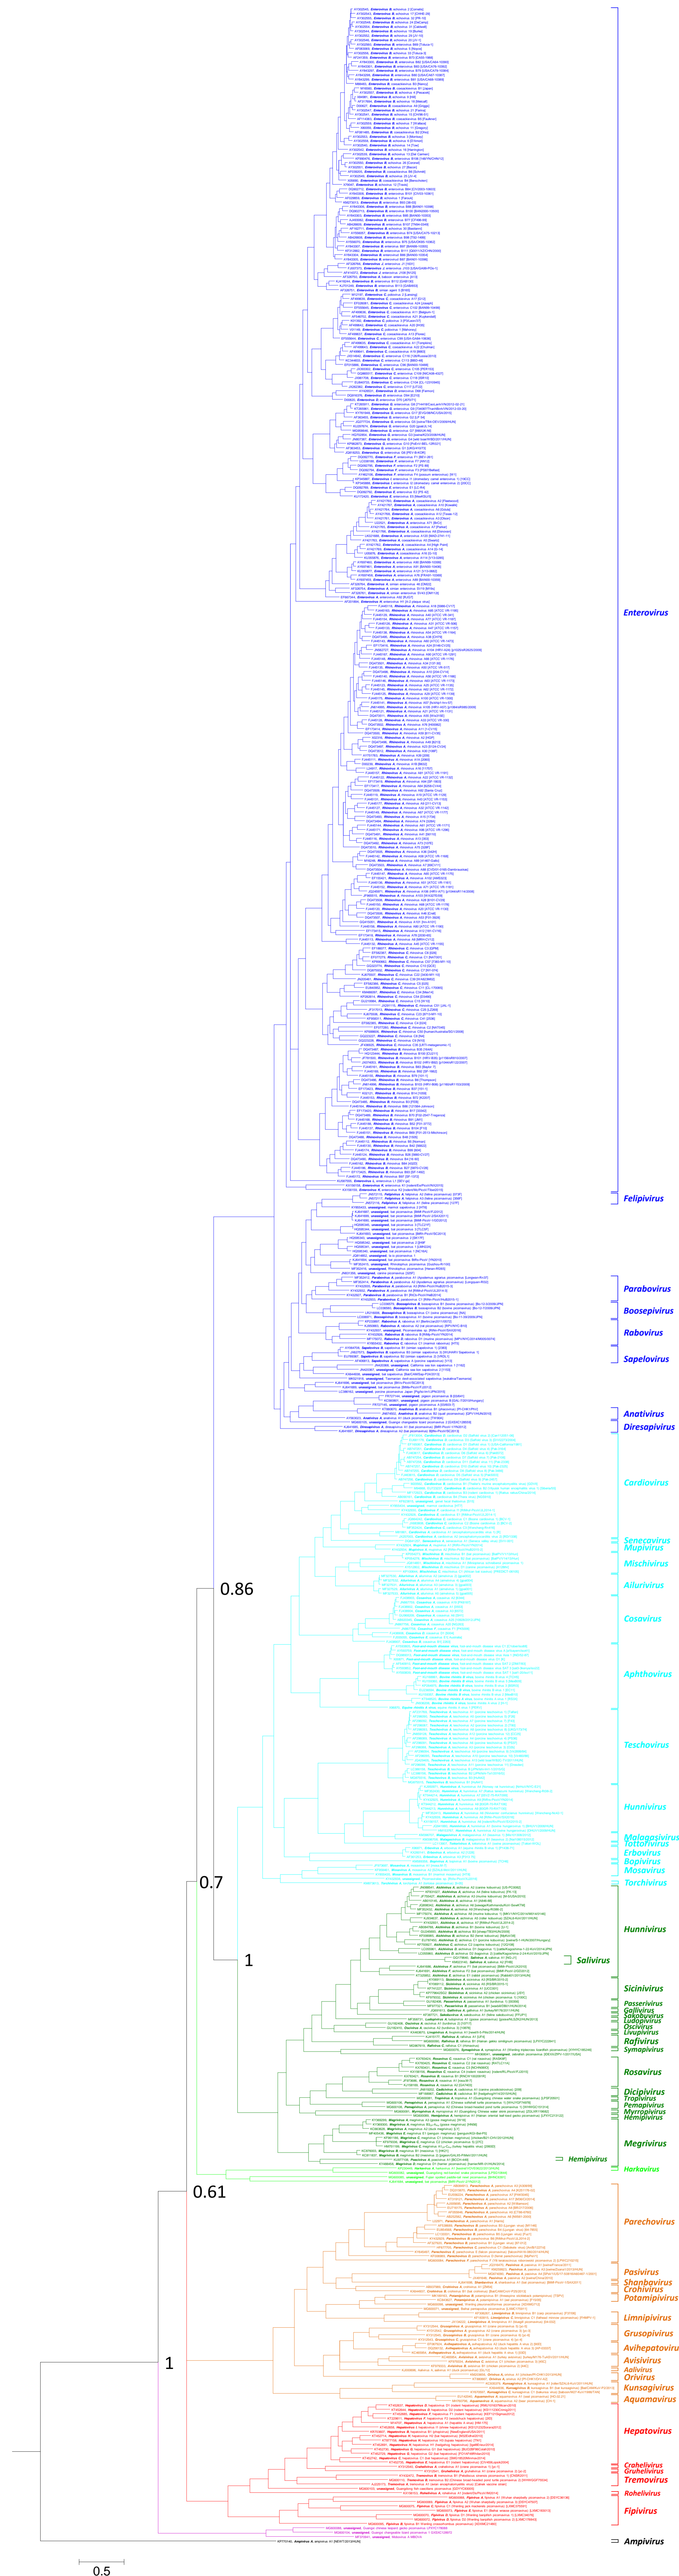

Clade 3 (SG3)

*Ensavirinae*

Clade 1 (SG1)

*Caphthovirinae*

Clade 2 (SG2)

*Kodimesavirinae*

Clade 6

Clade 4 (SG4)

*Paavivirinae*

Clade 5 (SG5)

*Heptrevirinae*

Clade 7

Clade 8

- Enterovirus
- Felipivirus
- Parabovirus
- Boosepivirus
- Rabovirus
- Sapelovirus
- Anatovirus
- Diresapivirus
- Cardiovirus
- Senecavirus
- Mupivirus
- Mischivirus
- Ailarivirus
- Cosavirus
- Aphthovirus
- Teschovirus
- Hunnivirus
- Malagasyvirus
- Vattovirus
- Erbovirus
- Bopivirus
- Mosavirus
- Torchivirus
- Hunnivirus
- Salivirus
- Sicthivirus
- Passerivirus
- Gallivirus
- Lactopivirus
- Rafivirus
- Synapivirus
- Rosavirus
- Diclipivirus
- Tragivirus
- Pentapivirus
- Myriapivirus
- Hemipivirus
- Megrivirus
- Horkavirus
- Parechovirus
- Passivirus
- Shanbavirus
- Crobovirus
- Limniphivirus
- Grusapivirus
- Avihepatovirus
- Avilivirus
- Avilivirus
- Orivirus
- Kunshapivirus
- Aquamavirus
- Hepatovirus
- Crahevirus
- Grochivirus
- Tremovirus
- Rohelivirus
- Fipivirus
- Amplivirus
