# Supplementary material for: A proposed division of the family Picornaviridae into subfamilies based on phylogenetic relationships and functional genomic organization
Source: PubMed Central journal article supplement (PMC8421316; doi:10.1007/s00705-021-05178-9), 2021-08-04

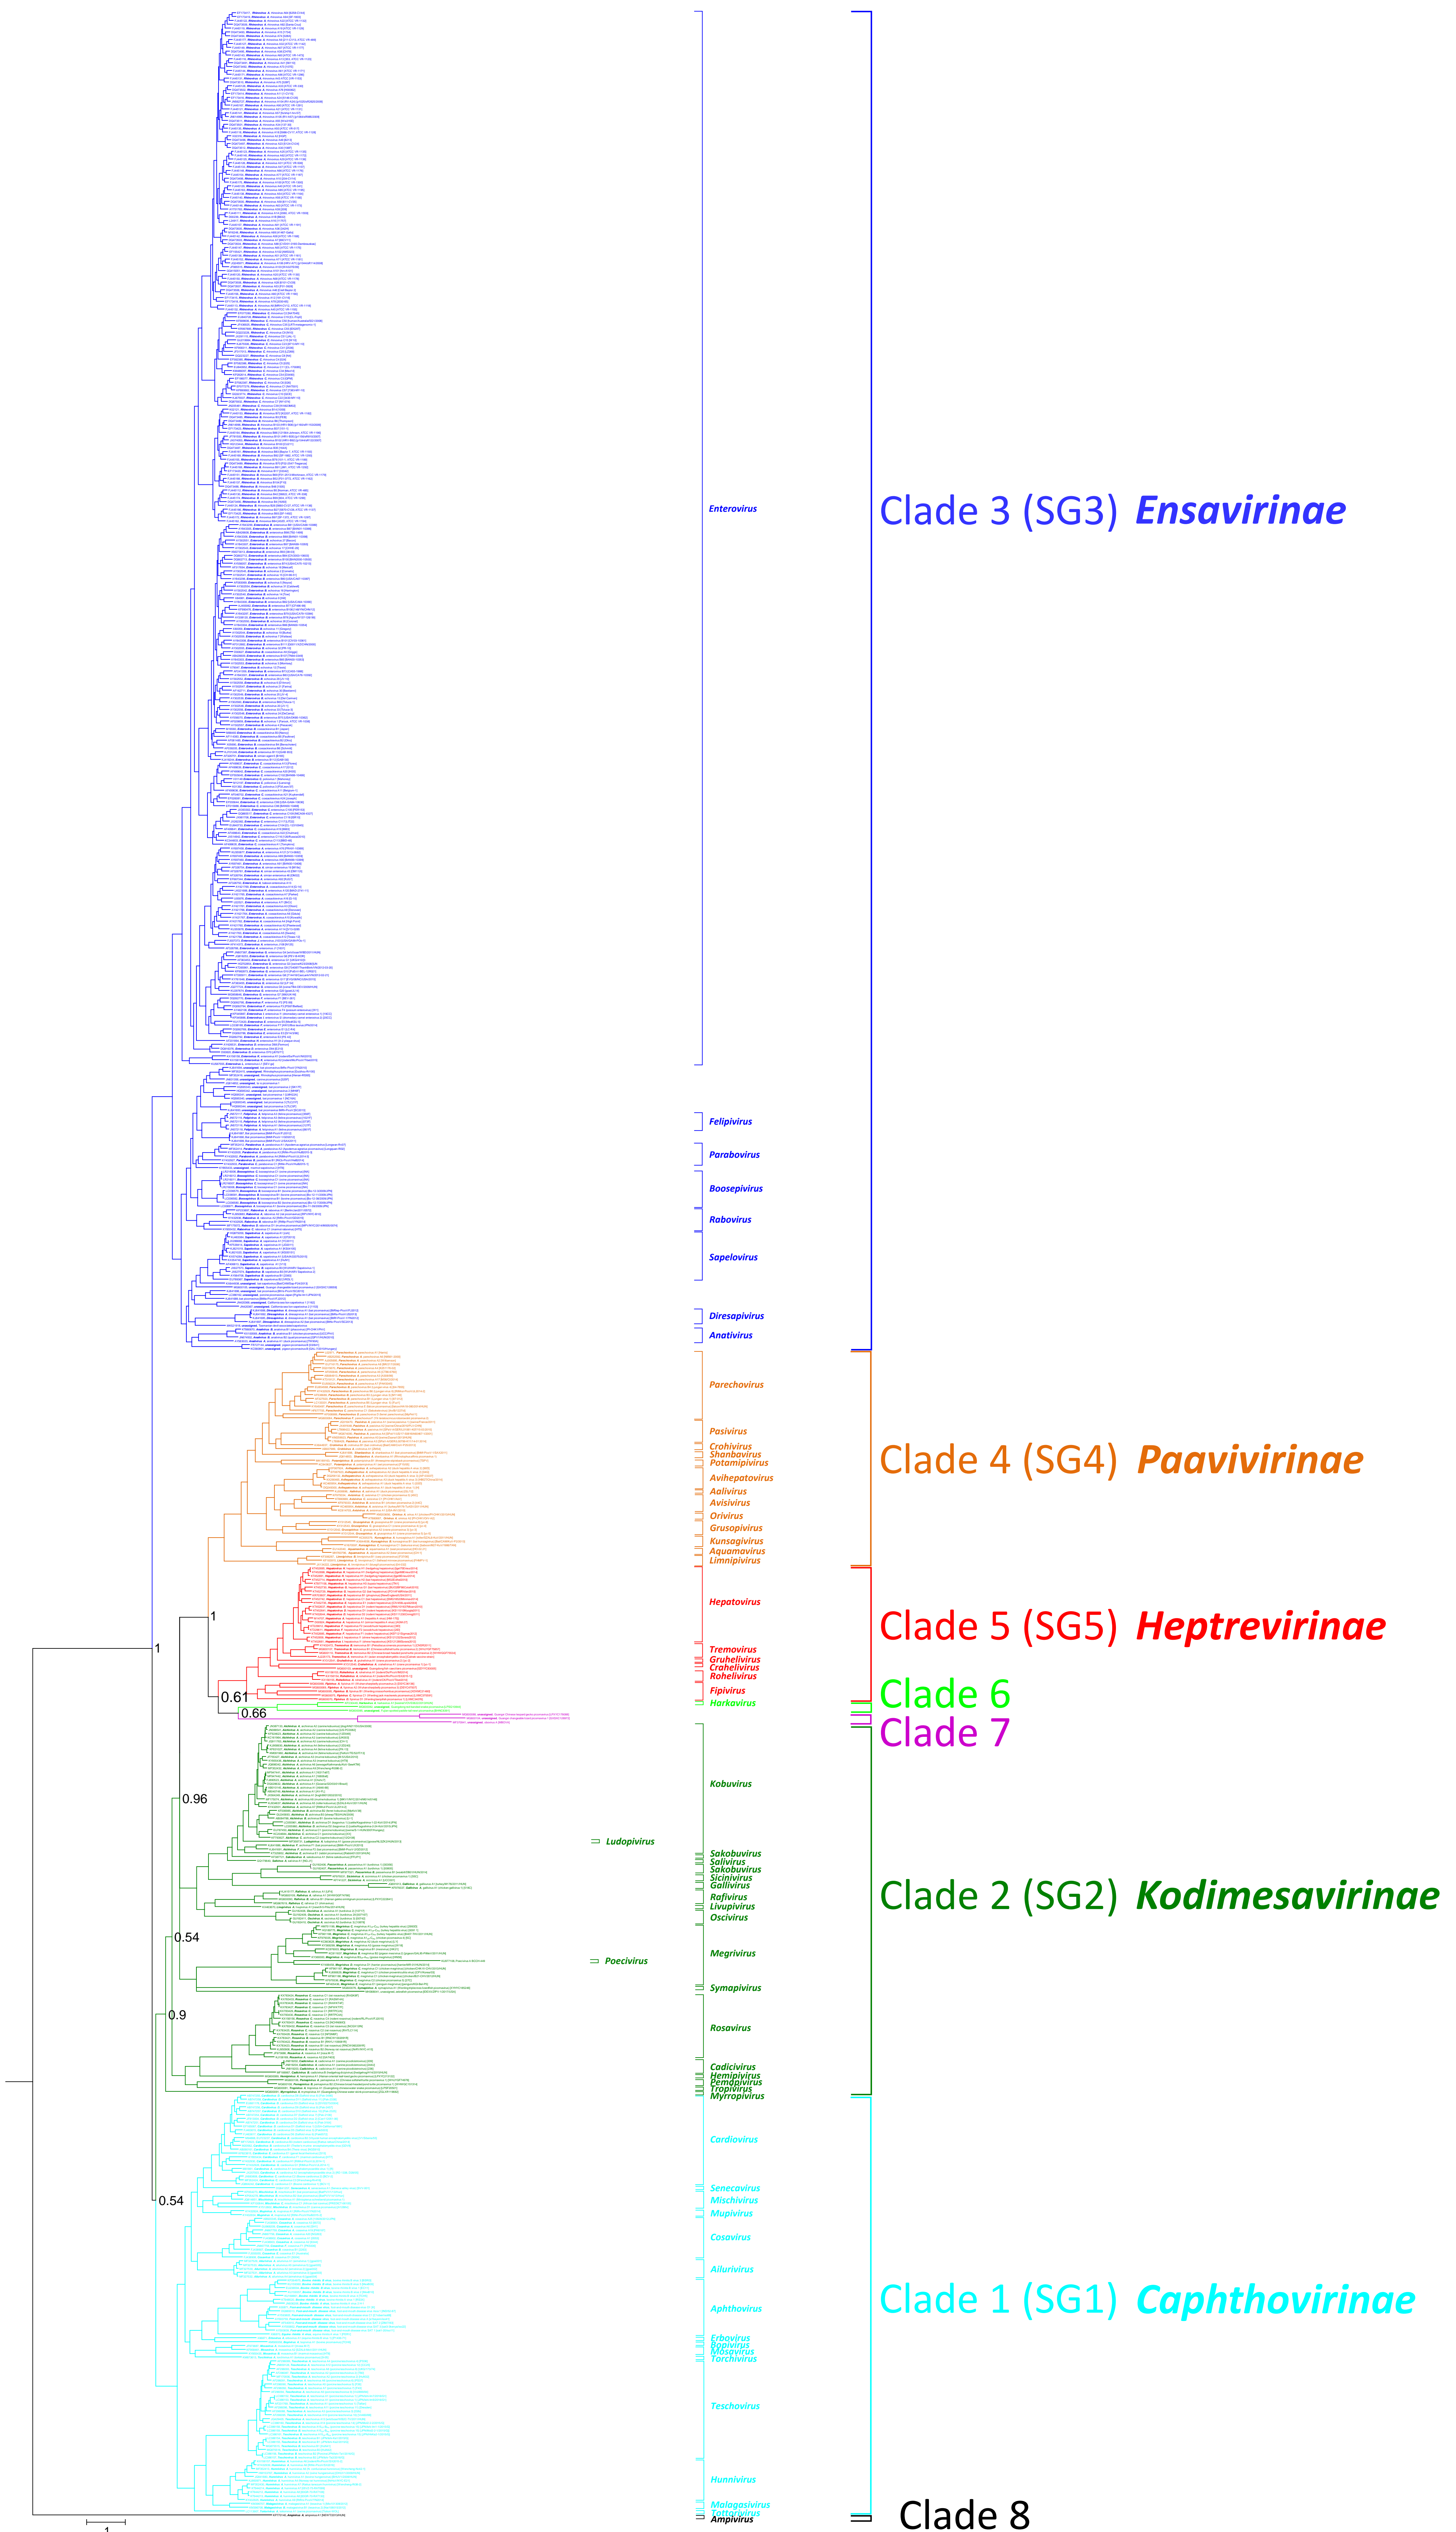

Supplement: 705_2021_5178_MOESM2_ESM.pdf [file 705_2021_5178_MOESM2_ESM.pdf]
