# Supplementary material for: A proposed division of the family Picornaviridae into subfamilies based on phylogenetic relationships and functional genomic organization
Source: PubMed Central journal article supplement (PMC8421316; doi:10.1007/s00705-021-05178-9), 2021-08-04
Supplement: 705_2021_5178_MOESM5_ESM.pdf [file 705_2021_5178_MOESM5_ESM.pdf]

2B,  
SG3

12 mio gen.  
GTR+G+I

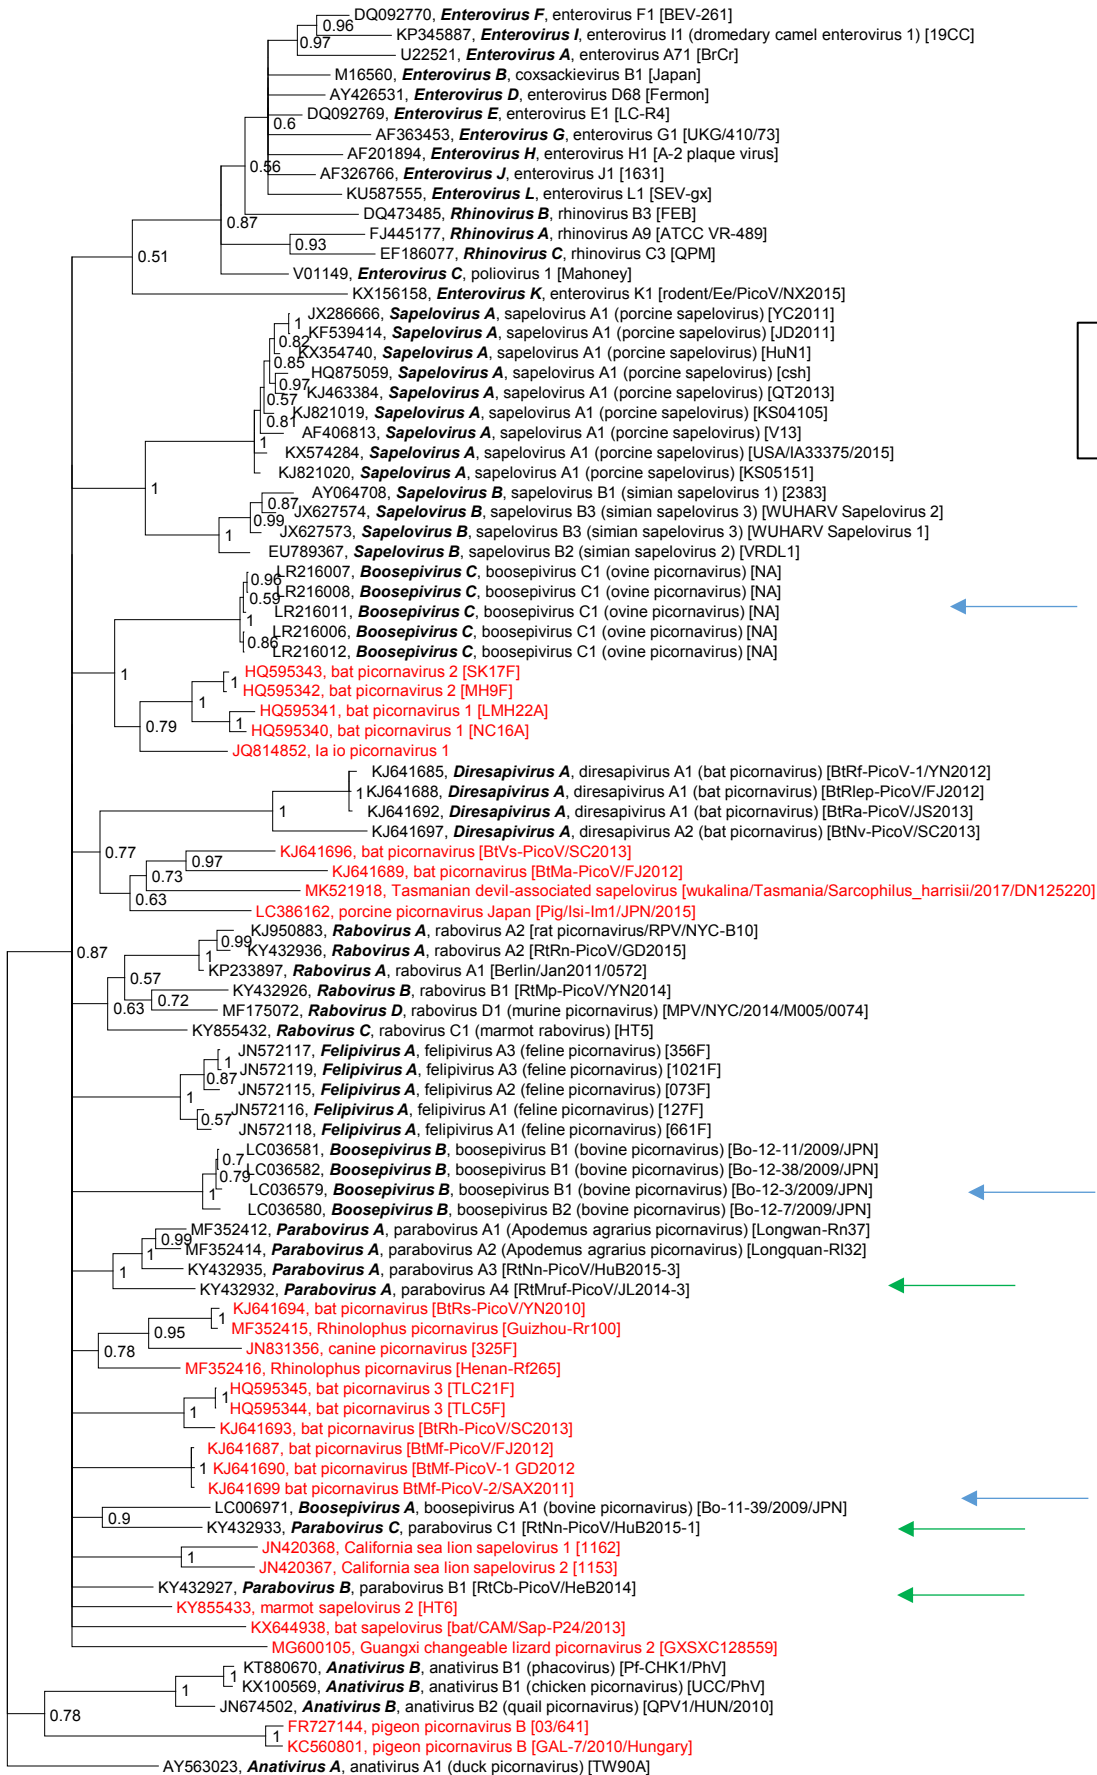

0.2
